# Supplementary material for: Gold nanostar substrates for SERS-based chemical sensing in the femtomolar regime
Source: Royal Society of Chemistry journal article supplement (doi:10.1039/c4nr02513j), 2014-01-01
Supplement: c4nr02513j1.pdf [file c4nr02513j1.pdf]

## Gold Nanostar Substrates for SERS-based Chemical Sensing in the Femtomolar Regime

A. S. D. S. Indrasekara,<sup>a</sup> S. Meyers,<sup>a</sup> S. Shubeita,<sup>c</sup> L. C. Feldman,<sup>a,b,c</sup> T. Gustafsson<sup>c</sup>  
and L. Fabris<sup>a,b</sup>

### Supporting Information

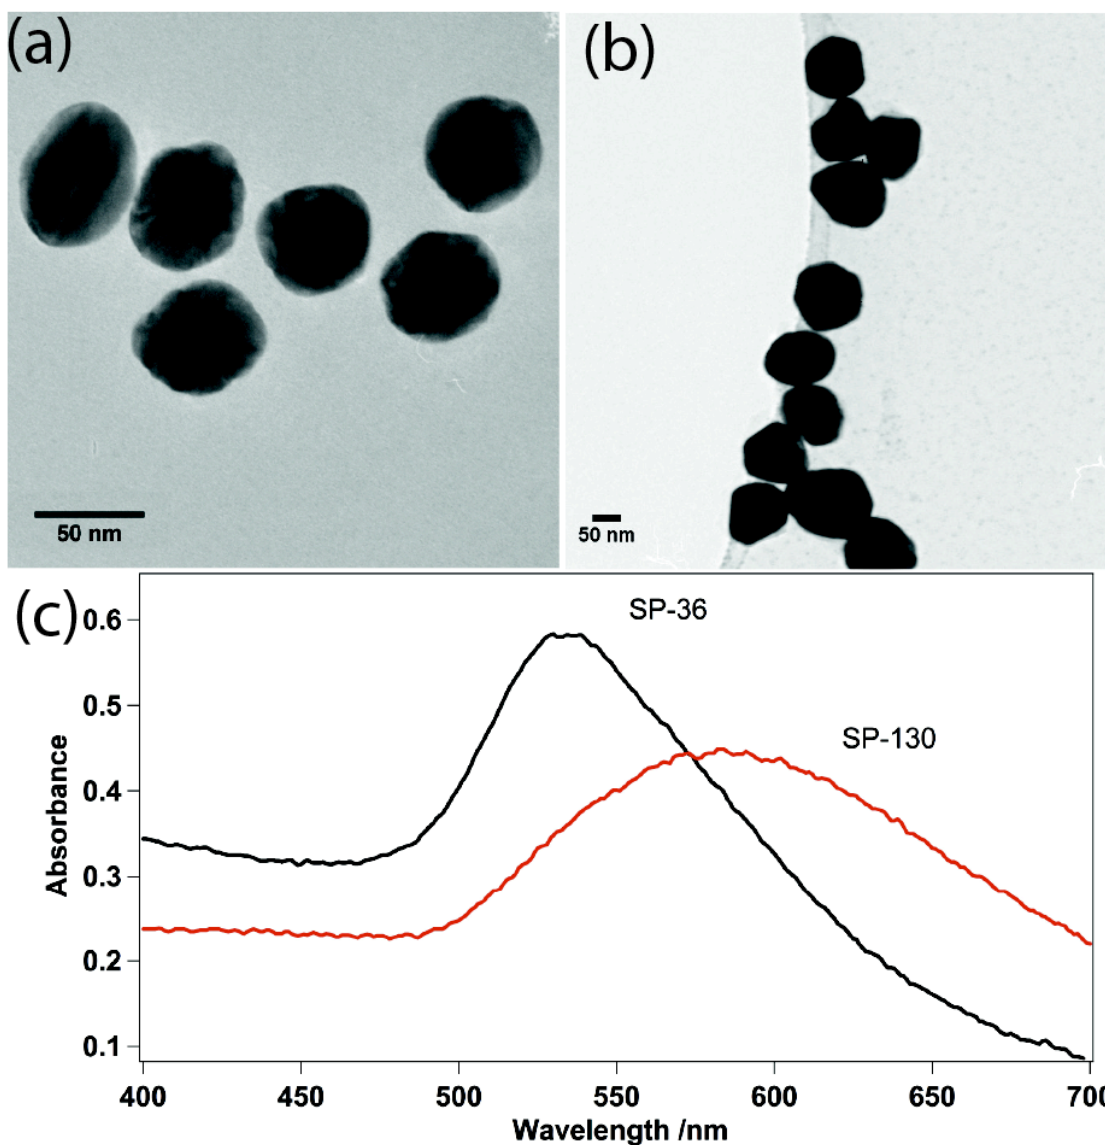

**Fig. S1** Gold nanospheres of 36 nm (SP-36) and 130 nm (SP-130) in diameter, values equivalent to the inner (i.e. core) and outer (i.e. the imaginary sphere traced by the outermost atoms on the tips) diameter of nanostars, were synthesized and analyzed for SERS. Transmission electron micrographs of (a) SP-36, (b) SP-130, and (c) their UV-visible spectra.

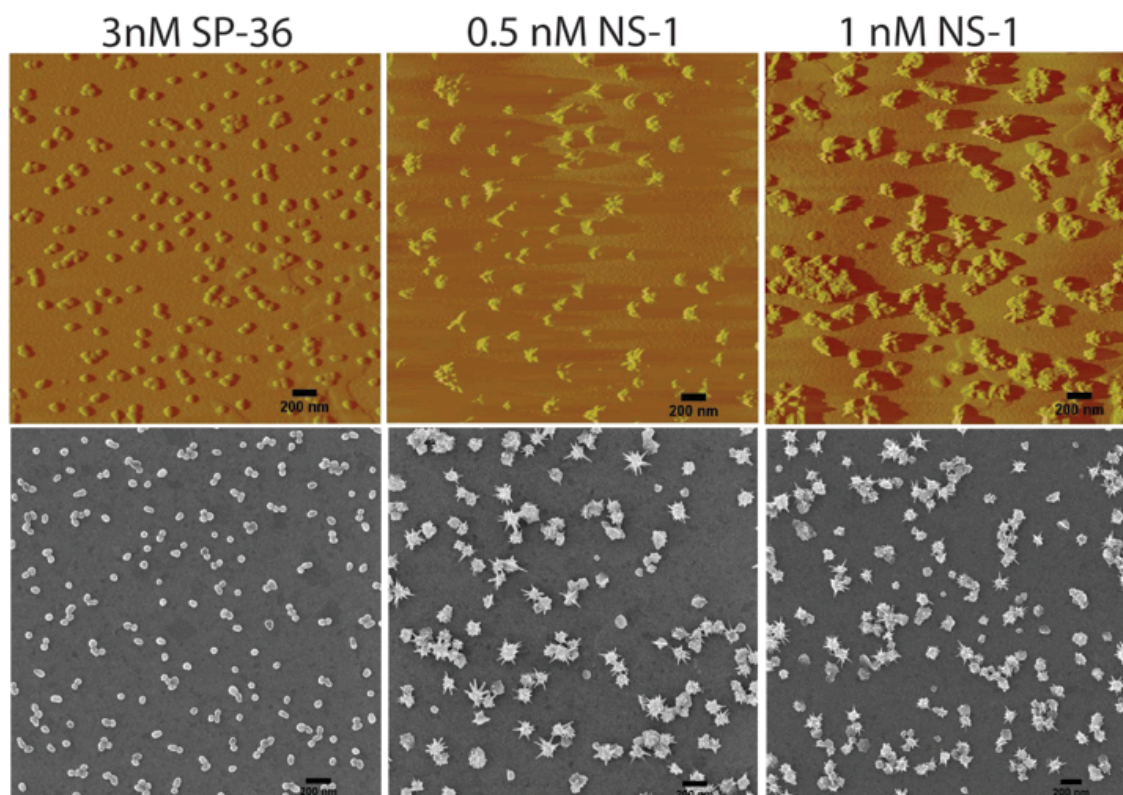

**Fig. S2** Atomic force micrographs of SP-36 and NS-1SERS substrates at different densities. Surface roughness factor,  $RMS_{[Rq]}$  value for 3 nM SP-36, 0.5 nM NS-1 and 1nM NS-1 are 12.66 nm, 27.67 nm and 34.11 nm respectively.

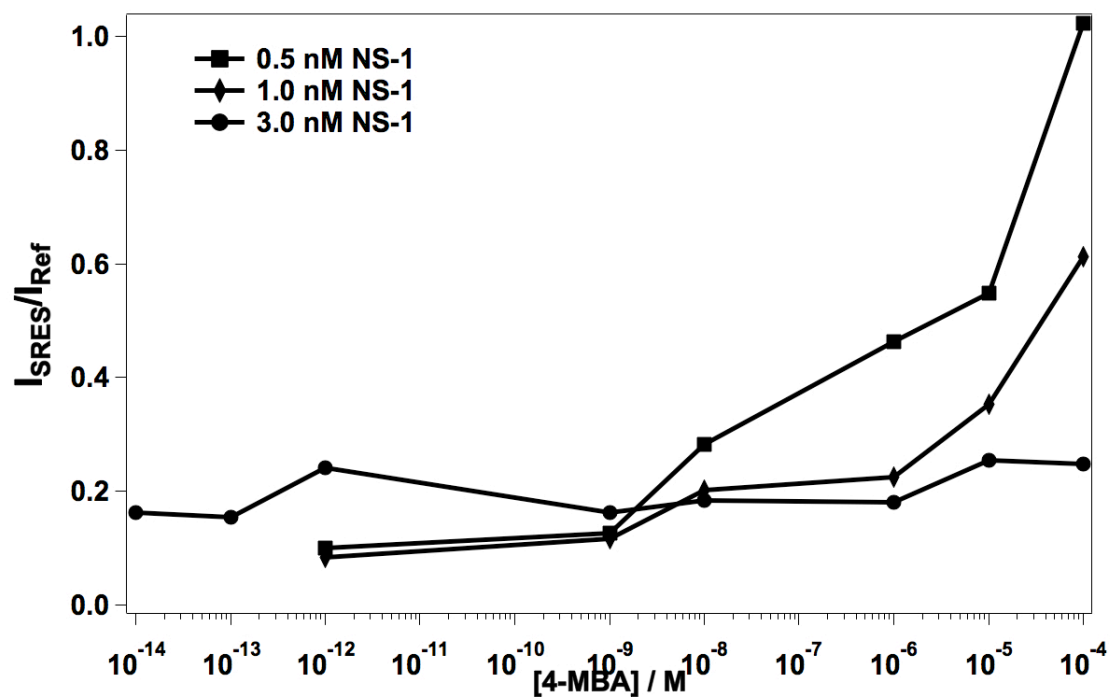

**Fig. S3** SERS response for MBA slightly varies as a function of the NS-1 density on the SERS substrate. The plotted SERS responses were collected under 785 nm laser (166  $\mu$ W).

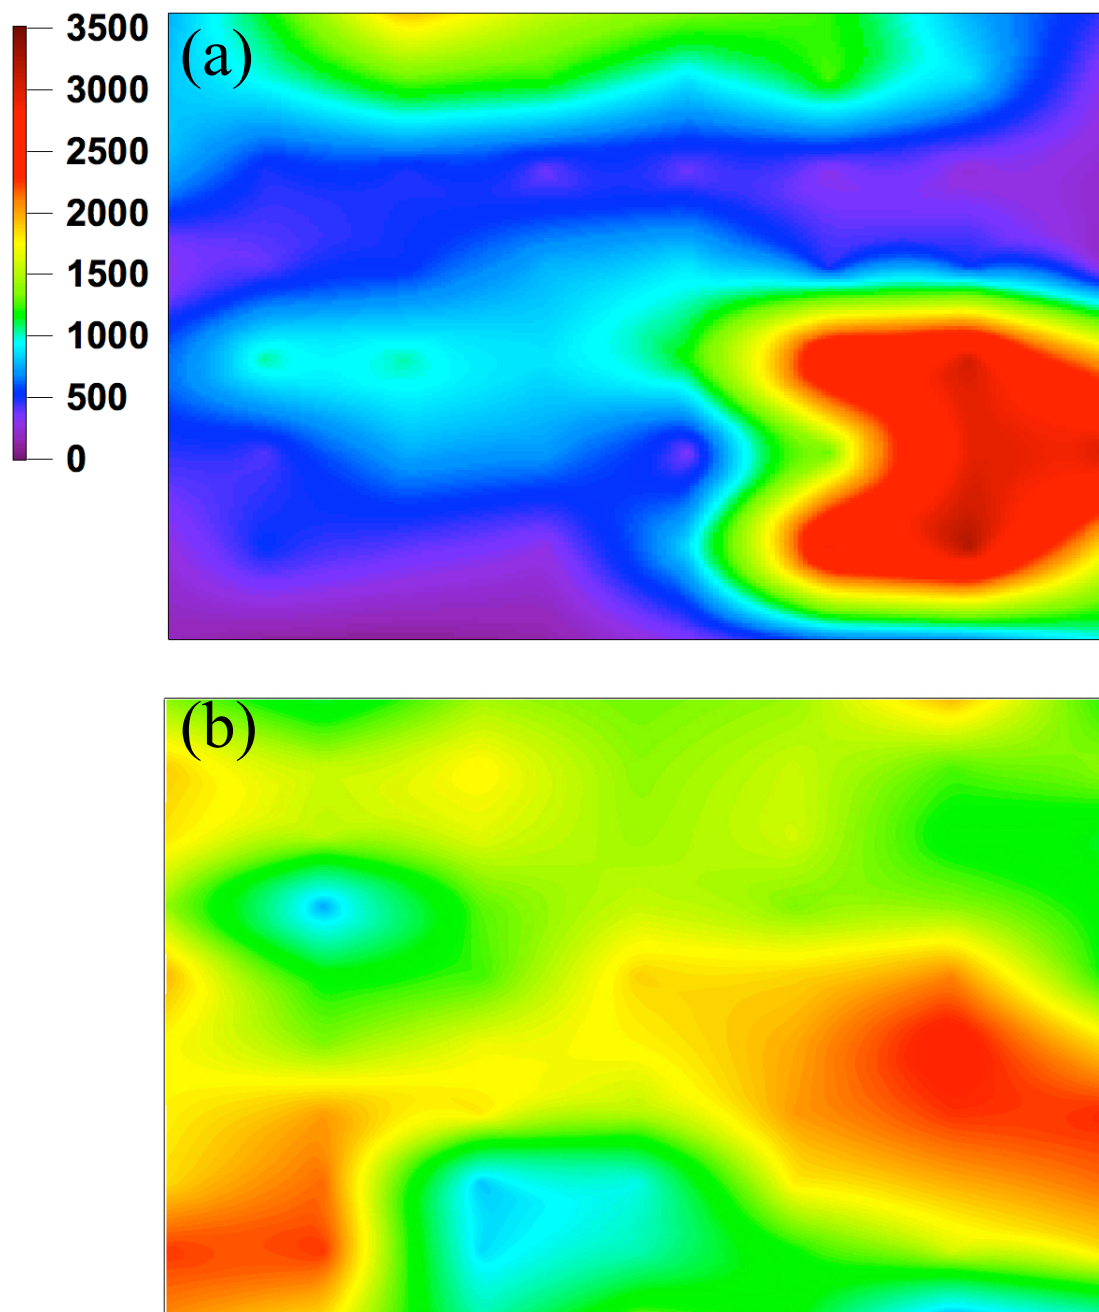

**Fig. S4** SERS maps for (a) 1 pM MBA on NS-1 substrate, and (b) 10 nM MBA on SP-130 substrate. The spatial variation of the SERS intensity of the peak at  $1077\text{ cm}^{-1}$  was used to construct the map. Map size  $20 \times 20\ \mu\text{m}^2$ , step increment  $2\ \mu\text{m}$ , data acquisition time 10 s, single accumulation, laser power  $166\ \mu\text{W}$  of 785nm diode laser and  $492\ \mu\text{W}$  of 633 nm He Ne laser.

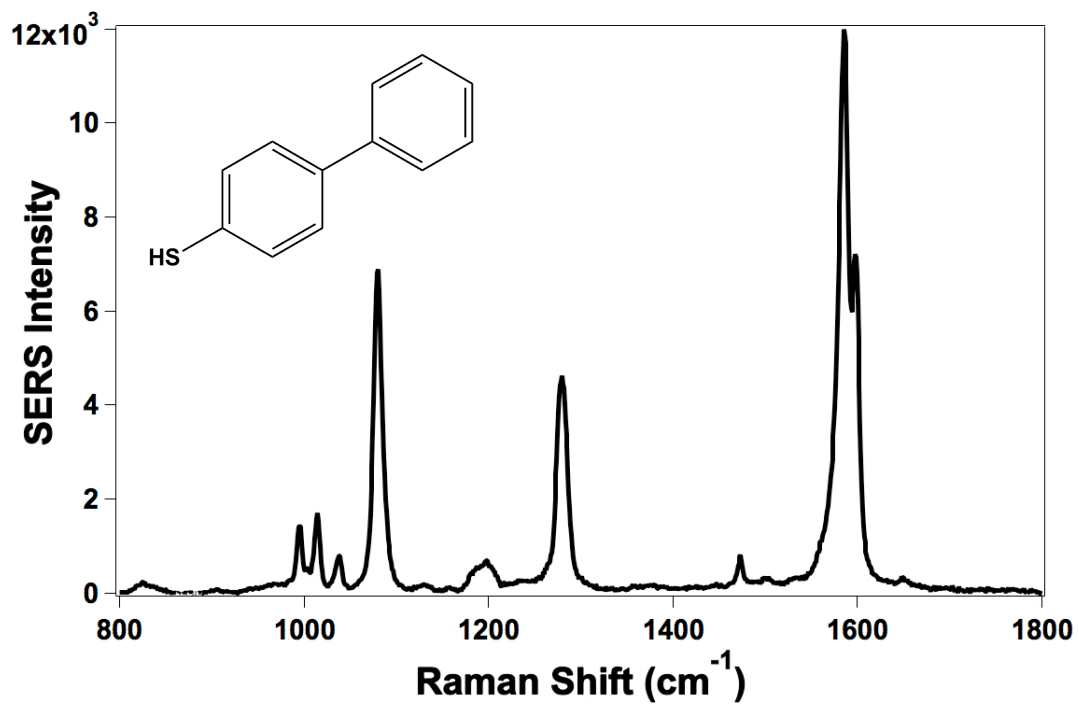

**Fig. S5** Raman spectrum of solid DBT under 785 nm laser (166  $\mu\text{W}$ ).

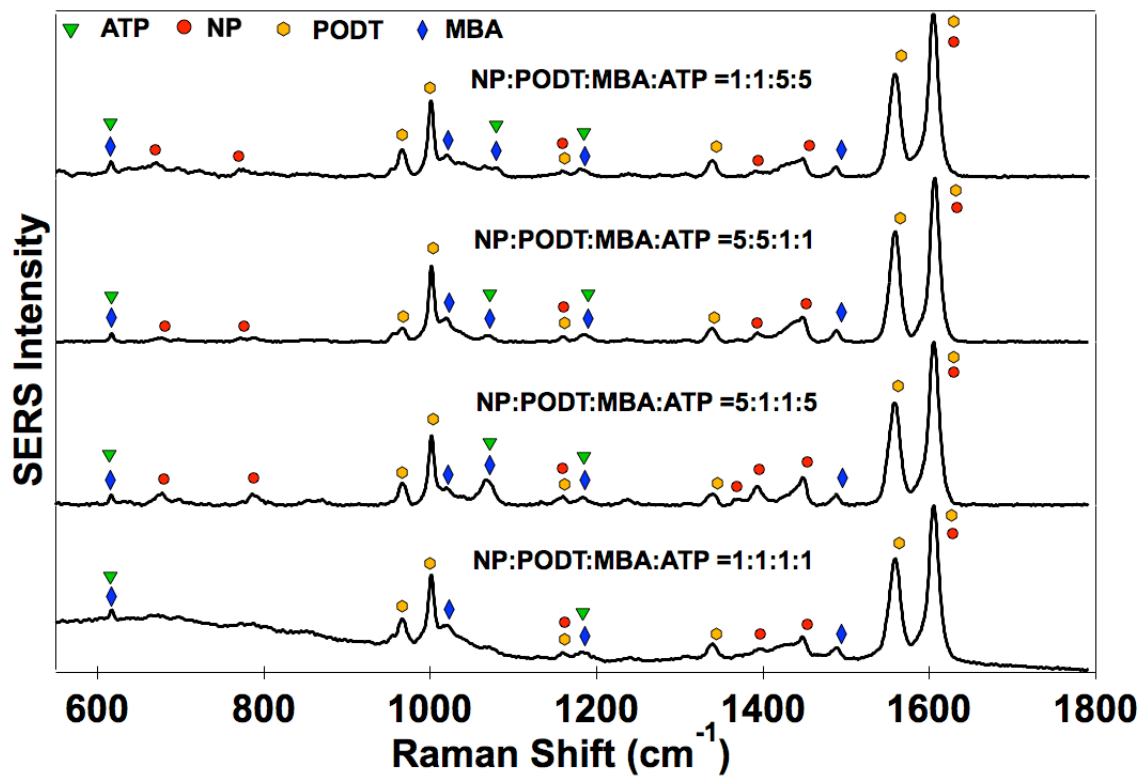

**Fig. S6** SERS spectra show the characteristic peaks for analytes in 4-plex chemical sensing experiments for  $10^{-6}$  M analytes on 3 nM NS-1 substrate. SERS spectra were collected under 785 nm laser excitation (1 accumulation, 10 s exposure).

**Table S1:** Characteristic SERS peaks of the analyte molecules used in multiplexing sensing study.

| MBA  | Raman Shift ( cm <sup>-1</sup> ) | Peak assignment                                                                                                                             |
|------|----------------------------------|---------------------------------------------------------------------------------------------------------------------------------------------|
|      | 718                              | Out-of-plane CCC vibration of the aromatic ring; MBA is oriented parallel (stay flat) to the surface <sup>1</sup>                           |
|      | 1020                             | Due to the decarboxylation of MBA during its adsorption to a rough gold surface <sup>1</sup>                                                |
|      | 1077                             | Aromatic ring vibration <sup>1</sup>                                                                                                        |
|      | 1124                             | In-phase vibrations of phenyl ring enhanced by pi conjugations; appear when molecule is in parallel (flat) to the gold surface <sup>2</sup> |
|      | 1421                             | Symmetric stretching vibration of dissociated carboxylate group (COO <sup>-</sup> ) <sup>1</sup>                                            |
|      | 1588                             | Aromatic ring vibration <sup>1</sup>                                                                                                        |
| ATP  | 921                              | $\pi$ CH <sup>3</sup>                                                                                                                       |
|      | 1089                             | NH <sub>2</sub> rock <sup>4</sup>                                                                                                           |
|      | 1180                             | CN stretching in aromatic amines <sup>5</sup>                                                                                               |
|      | 1589                             | CC stretching in phenyl ring and NH <sub>2</sub> bend <sup>4</sup>                                                                          |
| Nap  | 787                              | Ring deformation <sup>6,7</sup>                                                                                                             |
|      | 1143                             | CH bend <sup>6</sup>                                                                                                                        |
|      | 1166                             | CC stretching, CC bending <sup>8</sup>                                                                                                      |
|      | 1375                             | CC stretching, ring deformation and stretching <sup>8</sup>                                                                                 |
|      | 1450                             | Ring stretching <sup>6</sup>                                                                                                                |
|      | 1567, 1580, 1612                 | Ring stretching <sup>6</sup>                                                                                                                |
| PODT | 957,993                          | Phenyl ring deformation <sup>9</sup>                                                                                                        |
|      | 1280 to 1350 and 1450 to 1530    | N=N-O symmetric stretching <sup>5</sup>                                                                                                     |
|      | 1410 to 1440                     | N=N aromatic stretching <sup>5</sup>                                                                                                        |
|      | 1528, 1549                       | Oxadiazole ring trans and cis vibrations <sup>9</sup>                                                                                       |
|      | 1609                             | Phenyl ring vibration <sup>9</sup>                                                                                                          |

## References

- (1) Michota, A.; Bukowska, J. *J. Raman Spectrosc.* **2003**, *34*, 21.
- (2) Chen, T., Wang, H., Chen, G., Wang, Y., Feng, Y., Teo, W. S., Wu, T.; Chen, H. *ACS Nano* **2010**, *4*, 3087.
- (3) Osawa, M., Matsuda, N., Yoshii, K.; Uchida, I. *J. Phys. Chem.* **1994**, *98*, 12702.
- (4) Baia, M., Toderas, F., Baia, L., Popp, J.; Astilean, S. *Chem. Phys. Lett.* **2006**, *422*, 127.
- (5) Lambert, J. B. *Introduction to organic spectroscopy*; Macmillan: New York.
- (6) Alvarez-Puebla, R., Dos, S., Jr; Aroca, R. F. *Analyst* **2004**, *129*, 1251.
- (7) Xu, J., Du, J., Jing, C., Zhang, Y.; Cui, J. *ACS Appl. Mater. Interfaces* **2014**, DOI: 10.1021/am500705a
- (8) Srivastava, A.; Singh, V. *Indian J. Pure Appl. Phys.* **2007**, *45*, 714.
- (9) Orgzall, I., Mikat, J., Lorenz, B., Dietel, R., Knochenhauer, G.; Schulz, B. *Polymer* **1997**, *38*, 1537.
